# Supplementary material for: Generation of Fibrotic Liver Organoids Using Hepatocytes, Primary Liver Sinusoidal Endothelial Cells, Hepatic Stellate Cells, and Macrophages
Source: MDPI journal article supplement (doi:10.3390/cells12212514), 2023-10-24
Supplement: s1 [file s1]

**Supplementary Table S1.** Primer sequences used in this study.

| Gene name                     | Sequence (5'-3') |                        | Accession #    |
|-------------------------------|------------------|------------------------|----------------|
| <i>GAPDH</i>                  | Forward          | CAAGGCTGAGAACGGAAGC    | NM_001256799.3 |
|                               | Reverse          | AGGGGGCAGAGATGATGACC   |                |
| <i>AFP</i>                    | Forward          | AGTGAGGACAAACTATTGGCCT | NM_001354717.2 |
|                               | Reverse          | ACACCAGGGTTTACTGGAGTC  |                |
| <i>ALB</i>                    | Forward          | TTTATGCCCCGGAACCTCTTT  | NM_000477.7    |
|                               | Reverse          | AGTCTCTGTTTGGCAGACGAA  |                |
| <i>CYP3A4</i>                 | Forward          | AAGTCGCCTCGAAGATACACA  | NM_001202855.3 |
|                               | Reverse          | AAGGAGAGAACTGCTCGTG    |                |
| <i>CYP3A7</i>                 | Forward          | TGCTTTGTCCTTCCGTAAGGG  | NM_000765.5    |
|                               | Reverse          | CAGCATAGGCTGTTGACAGTC  |                |
| <i>CYP2C9</i>                 | Forward          | GCCTGAAACCCATAGTGGTG   | NM_000771.4    |
|                               | Reverse          | GGGGCTGCTCAAAATCTTGATG |                |
| <i>CYP2D6</i>                 | Forward          | TGGCAAGGTCCTACGCTTC    | NM_000106.6    |
|                               | Reverse          | GCCACCACTATGCACAGGTT   |                |
| <i>G6PC1</i>                  | Forward          | CTACTACAGCAAACTTCCGTG  | NM_000151.4    |
|                               | Reverse          | GGTCGGCTTTATCTTTCCTGA  |                |
| <i>GLUT2</i>                  | Forward          | GGGCAATTATGATCTGTGGCA  | NM_000340.2    |
|                               | Reverse          | TTCTGCTCACTCGATGCTTCT  |                |
| <i>HNF4a</i>                  | Forward          | CACGGGCAAACACTACGGT    | NM_178849.3    |
|                               | Reverse          | TTGACCTTCGAGTGCTGATCC  |                |
| <i>UGT2B7</i>                 | Forward          | GATCCCAACAACATCCGCT    | NM_001074.4    |
|                               | Reverse          | CAGCAGCTCACTACAGGGAA   |                |
| <i>KRT19</i>                  | Forward          | GTCACAGCTGAGCATGAAAGC  | NM_002276.5    |
|                               | Reverse          | GCTCACTATCAGCTCGCACA   |                |
| <i>SOX9</i>                   | Forward          | GGAAGTCGGTGAAGAACGGG   | NM_000346.3    |
|                               | Reverse          | TGTTGGAGATGACGTCGCTG   |                |
| <i>AXIN2</i>                  | Forward          | AGCTTACATGAGTAATGGGG   | NM_004655.4    |
|                               | Reverse          | AATTCCATCTACACTGCTGTC  |                |
| <i>iNOS</i>                   | Forward          | GTGCAAACCTTCAAGGCAGC   | NM_000625.4    |
|                               | Reverse          | CTTGGCCATCCTCACAGGAG   |                |
| <i>IL-1<math>\beta</math></i> | Forward          | CAGGCTGCTCTGGGATTCTC   | NM_000576.3    |

|                                |         |                          |             |
|--------------------------------|---------|--------------------------|-------------|
|                                | Reverse | GTCCTGGAAGGAGCACTTCAT    |             |
| <i>TNF-<math>\alpha</math></i> | Forward | CCCATGTTGTAGCAAACCCT     | NM_000594.4 |
|                                | Reverse | TGAGGTACAGGCCCTCTGAT     |             |
| <i>IL-6</i>                    | Forward | GTAGCCGCCCCACACAGACAGCC  | NM_000600.5 |
|                                | Reverse | GCCATCTTTGGAAGGTTC       |             |
| <i>IL-10</i>                   | Forward | TTCGAGATCTCCGAGATGCC     | NM_000572.3 |
|                                | Reverse | AGTTCACATGCGCCTTGATG     |             |
| <i>IL-4</i>                    | Forward | AGGAAACCTTCTGCAGGGCT     | NM_000589.3 |
|                                | Reverse | CTCTCTCATGATCGTCTTTAGCCT |             |
| <i>TGF-<math>\beta</math></i>  | Forward | AAGTGGACATCAACGGGTTC     | NM_000660.7 |
|                                | Reverse | GTCCAGGCTCCAAATGTAGG     |             |
| <i>CD206</i>                   | Forward | GTGATGGGACCCCTGTAACG     | NM_002438.4 |
|                                | Reverse | CTGCCCAGTACCCATCCTTG     |             |
| <i>CD31</i>                    | Forward | AACGGAAGGCTCCCTTGATG     | NM_000442.5 |
|                                | Reverse | TAAGAACCGGCAGCTTAGCC     |             |
| <i>LYVE1</i>                   | Forward | GAGCAAAAAGGCGAACCAGC     | NM_006691   |
|                                | Reverse | CAACCCAGCCATAGCTGCAAG    |             |
| <i>VEGF-A</i>                  | Forward | ACATCACCATGCAGATTATGCG   | NM_003376.6 |
|                                | Reverse | ACCGGGATTTCTTGCGCTTT     |             |
| <i>VEGFR2</i>                  | Forward | ACCGGCTGAAGCTAGGTAAG     | NM_002253.4 |
|                                | Reverse | CGATGCTCACTGTGTGTTGC     |             |
| <i>eNOS</i>                    | Forward | GCCGGAACAGCACAAAGAGTTAT  | NM_000603.5 |
|                                | Reverse | AGCCCGAACACACAGAACC      |             |
| <i>EDNRB</i>                   | Forward | CAATGTCTACAAGCTGCTGGC    | NM_003991.4 |
|                                | Reverse | GCTGTCCATTTTGGAACCCC     |             |
| <i><math>\alpha</math>-SMA</i> | Forward | GACAATGGCTCTGGGCTCTGTAA  | NM_001613.4 |
|                                | Reverse | CTGTGCTTCGTCACCCACGTA    |             |
| <i>COL1A1</i>                  | Forward | CAGGAGGCACGCGGAGTGTG     | NM_000088.3 |
|                                | Reverse | GGCAGGGCTCGGGTTCCAC      |             |
| <i>COL2A1</i>                  | Forward | TTCCCCCTCCTGCTCCAAG      | NM_001844.5 |
|                                | Reverse | GCCAGCCTCCTGGACATC       |             |
| <i>COL3A1</i>                  | Forward | TCCCGGTCCTGCTGGTTCCC     | NM_000090.4 |
|                                | Reverse | ATGGCAGCGGCTCCAACACC     |             |
| <i>COL4A1</i>                  | Forward | TTTCGACTTGCGGCTCAAAG     | NM_001845.6 |

|        |         |                          |             |
|--------|---------|--------------------------|-------------|
|        | Reverse | CAATCCTACAGAACCCGGCG     |             |
| COL4A2 | Forward | GAGGCTAAGTGGGACTGACC     | NM_001846.4 |
|        | Reverse | AAACTTCTTCACACCCGCCA     |             |
| COL5A3 | Forward | AGTTTCCCGCGGACCC         | NM_015719.4 |
|        | Reverse | ACATCCACAGGATCGGCCT      |             |
| COL6A1 | Forward | CACTCAAAAGCAGCGTGGAC     | NM_001848.3 |
|        | Reverse | GTCGGTCACCACAATCAGGT     |             |
| COL6A2 | Forward | AACATGACGCTGTTCTCCGA     | NM_001849.4 |
|        | Reverse | CACGGACAGCTCTGTTTGG      |             |
| COL6A3 | Forward | AGGTTTGCTCAGGGGTTTCATA   | NM-004369.4 |
|        | Reverse | AGCCGCACCATTTTTGACAT     |             |
| LAMA1  | Forward | CTTCCTGAAAGGCGGCTACA     | NM_005559.4 |
|        | Reverse | TGTGCTTCCTCACGATCACC     |             |
| LAMB1  | Forward | TGTGGTGGTCTGGTTACTGTT    | NM_002291.3 |
|        | Reverse | TCAGTTTTGCTTCAGAGACCATCT |             |
| LAMC1  | Forward | AGCGCTGTCCAAAAGAATGC     | NM_002293.4 |
|        | Reverse | CCTGGTCAGCGTCATCTTGT     |             |
| FN1    | Forward | CTATCACCTGTACCCACACGG    | NM_212482.4 |
|        | Reverse | CCAGGAACCCTGAACTGTAAGG   |             |
| NID1   | Forward | CGGATTCCGTGAGAGGGAAC     | NM_002508.3 |
|        | Reverse | AGGTCAGTCCATTGGGCAAG     |             |
| ELN    | Forward | CATTTCTCCCCGAGATGGCG     | NM_000501.4 |
|        | Reverse | CGAGACCAGCCCCTGGATAA     |             |
